# Supplementary material for: MicroRNA and mRNA Transcriptome Profiling in Primary Human Astrocytes Infected with Borrelia burgdorferi
Source: PLoS One. 2017 Jan 30;12(1):e0170961. doi: 10.1371/journal.pone.0170961 (PMC5279786; doi:10.1371/journal.pone.0170961)
Supplement: S4 File — List of microRNAs that were significantly different (p-value of 0.01 or below, four-fold change) between the untreated and the Bb treated groups. (XLSX) [file pone.0170961.s006.xlsx]

## Sheet: Sheet1
24h
genes	logFC	logCPM	LR	PValue	FDR
hsa-miR-4792_MIMAT0019964	-5.20042	6.19161	155.132	1.31e-35	9.49e-33
hsa-miR-139-5p_MIMAT0000250	-2.71654	1.84612	12.9296	0.000323434	0.0390277
48h
genes	logFC	logCPM	LR	PValue	FDR
hsa-miR-143-3p_MIMAT0000435	3.02334	13.1031	189.787	3.53903e-43	2.56226e-40
hsa-miR-135a-3p_MIMAT0004595	4.48098	3.93633	106.662	5.28005e-25	1.91138e-22
hsa-miR-135a-5p_MIMAT0000428	3.62265	5.01933	87.3719	8.99179e-21	2.17002e-18
hsa-miR-146b-5p_MIMAT0002809	2.09378	11.5845	83.0738	7.90468e-20	1.43075e-17
hsa-miR-212-3p_MIMAT0000269	2.65539	4.84585	73.7109	9.04378e-18	1.30954e-15
hsa-miR-122-5p_MIMAT0000421	-2.98333	5.31672	60.9168	5.95392e-15	7.1844e-13
hsa-miR-136-5p_MIMAT0000448	2.00426	5.94288	54.048	1.95651e-13	1.5739e-11
hsa-miR-199a-5p_MIMAT0000231	2.90772	7.35707	47.9793	4.30754e-12	2.67917e-10
hsa-miR-4792_MIMAT0019964	-2.32527	6.19161	47.0259	7.00555e-12	3.90155e-10
hsa-miR-145-3p_MIMAT0004601	2.07308	5.07985	44.6836	2.31587e-11	1.11779e-09
hsa-miR-33b-3p_MIMAT0004811	-2.48746	4.49491	42.5066	7.04443e-11	3.0001e-09
hsa-miR-143-5p_MIMAT0004599	2.59256	3.50793	37.1679	1.08381e-09	3.73657e-08
hsa-miR-216a-5p_MIMAT0000273	2.26366	3.28824	27.8062	1.34097e-07	2.55489e-06
hsa-miR-186-3p_MIMAT0004612	6.85961	1.90525	25.4095	4.63623e-07	7.62871e-06
hsa-miR-133a-3p_MIMAT0000427	2.20708	3.0731	25.0393	5.61748e-07	9.0379e-06
hsa-miR-18a-3p_MIMAT0002891	-2.4699	3.54881	21.9171	2.84689e-06	3.55371e-05
hsa-miR-1-3p_MIMAT0000416	3.42211	2.03152	19.3683	1.07782e-05	0.000113093
hsa-miR-942-5p_MIMAT0004985	-2.11793	3.58824	16.6396	4.5198e-05	0.00041422
hsa-miR-3619-5p_MIMAT0017999	-2.25872	3.35575	15.4321	8.55221e-05	0.000719977
hsa-miR-145-5p_MIMAT0000437	2.07529	2.8297	14.6324	0.000130651	0.00106283
hsa-miR-185-3p_MIMAT0004611	2.18025	2.53287	14.2382	0.000161069	0.00126755
hsa-miR-483-5p_MIMAT0004761	-3.64329	2.39915	13.6059	0.000225474	0.00166202
hsa-miR-3691-5p_MIMAT0018120	-2.22186	2.35768	10.8964	0.000963489	0.00571737
hsa-miR-7641_MIMAT0029782	-2.39626	2.27139	10.0044	0.0015617	0.00897358
hsa-miR-302a-3p_MIMAT0000684	-3.09708	1.53882	9.00806	0.00268792	0.0142048
hsa-miR-579-5p_MIMAT0026616	-4.95226	1.233	8.59071	0.00337882	0.016988
hsa-miR-656-5p_MIMAT0026627	-4.73073	0.977787	7.87239	0.00501952	0.0232957
hsa-miR-548ap-3p_MIMAT0021038	-2.13496	2.13107	7.69339	0.00554236	0.0250792
hsa-miR-3200-5p_MIMAT0017392	-4.73799	1.23032	7.59451	0.00585463	0.0263276
hsa-miR-4762-5p_MIMAT0019910	-2.95344	1.5754	7.37686	0.00660686	0.0293458
hsa-miR-376a-2-5p_MIMAT0022928	4.58229	0.98022	7.31226	0.00684857	0.0298705
hsa-miR-4797-3p_MIMAT0019973	4.58229	1.16678	7.31221	0.00684877	0.0298705
hsa-miR-3622a-5p_MIMAT0018003	-2.35497	1.75433	6.99099	0.00819211	0.0342838
hsa-miR-545-3p_MIMAT0003165	2.80497	1.77208	6.77091	0.00926558	0.0378999
hsa-miR-532-3p_MIMAT0004780	-2.8178	1.58071	6.62963	0.0100296	0.0405667
hsa-miR-487b-5p_MIMAT0026614	-4.47855	1.04453	6.56077	0.0104251	0.0414741
hsa-miR-326_MIMAT0000756	-4.4785	0.834404	6.56065	0.0104258	0.0414741
hsa-miR-3679-5p_MIMAT0018104	-2.03337	1.89791	6.32255	0.0119212	0.0459093
